# Supplementary material
Source: publisher site journal article supplement (https://www.dovepress.com/get_supplementary_file.php?f=386898.docx)
Supplement: Supplementary file 1 [file get_supplementary_file.php]

**Supplementary materials**


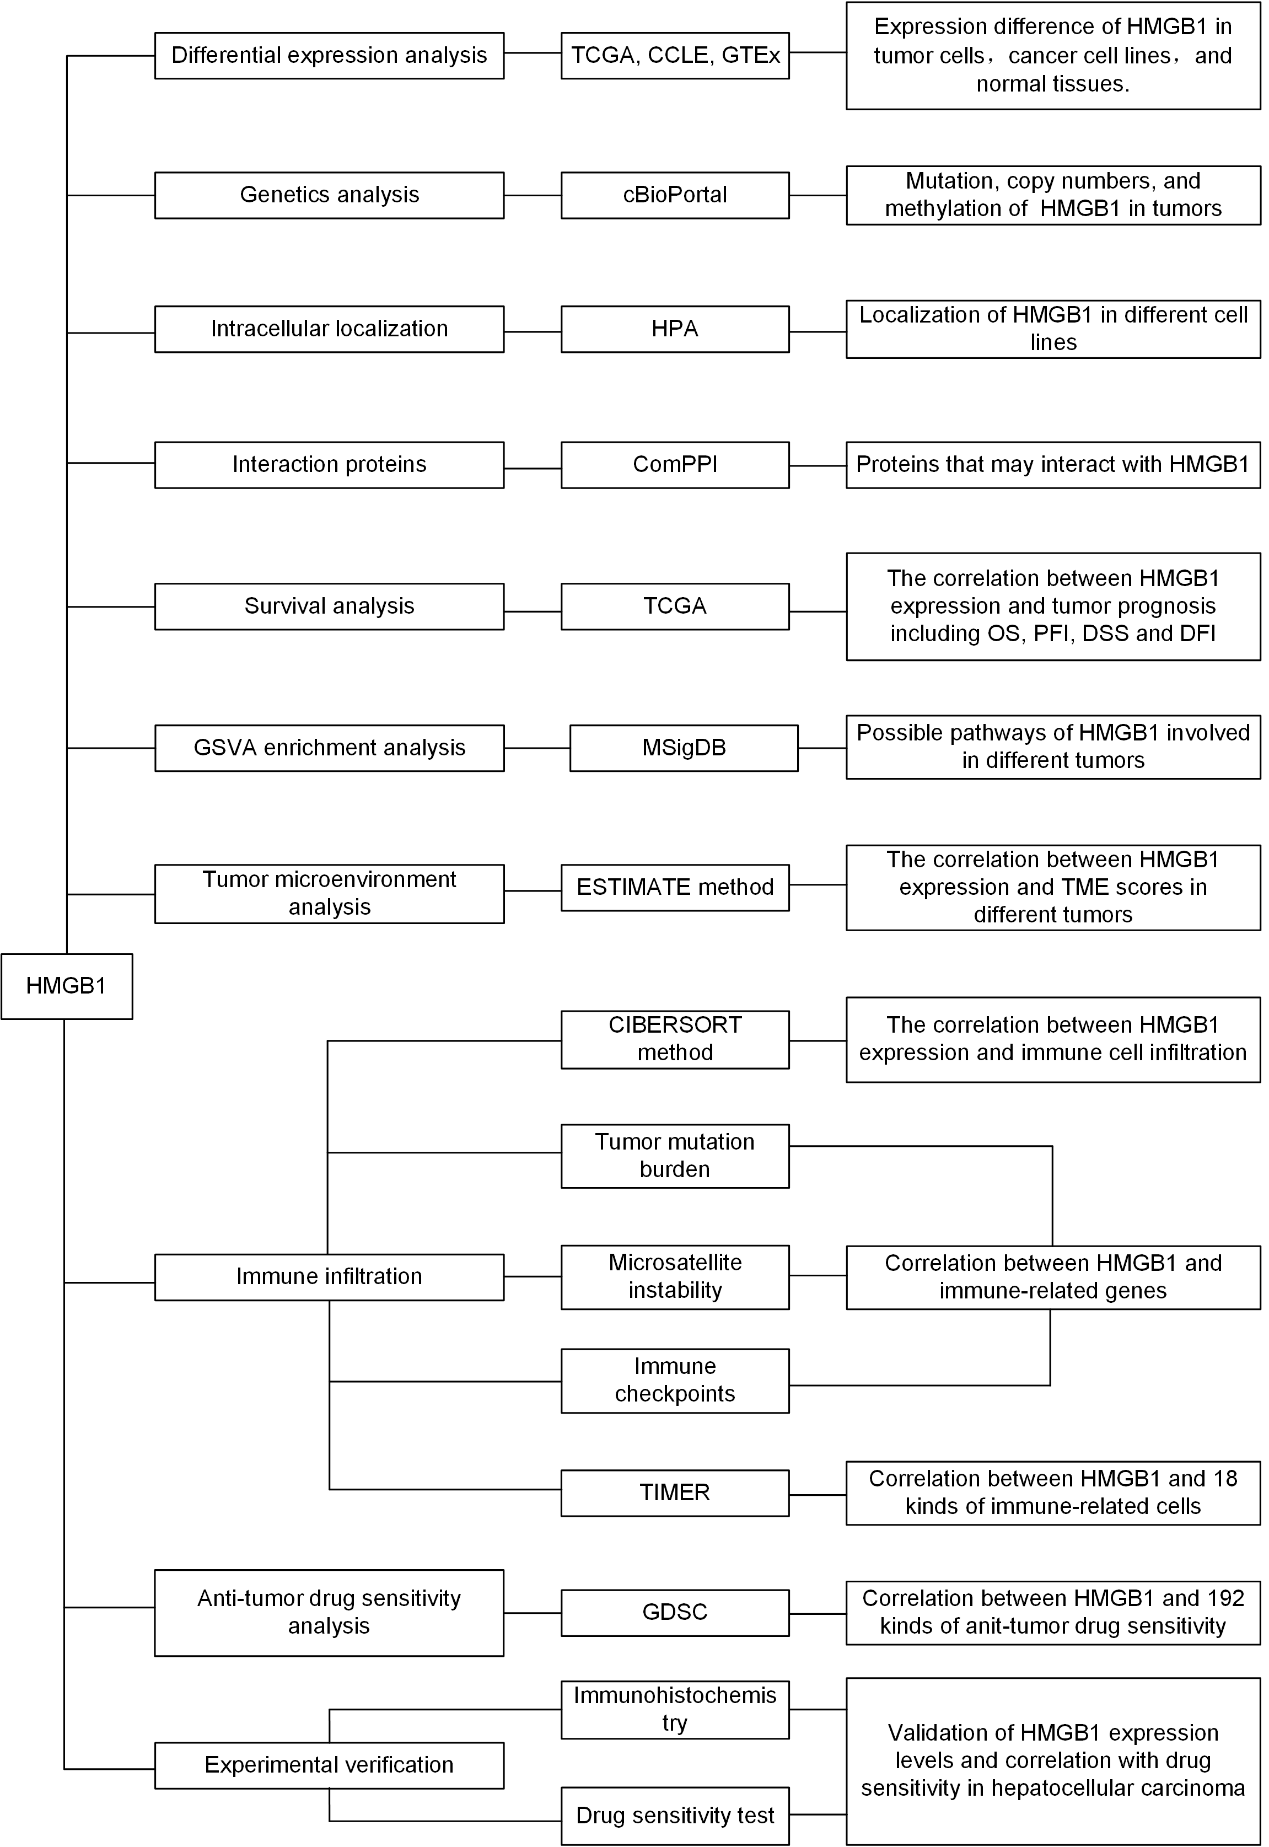


Figure S1: Flow chart of comprehensive role analysis of HMGB1 in pan-cancer.


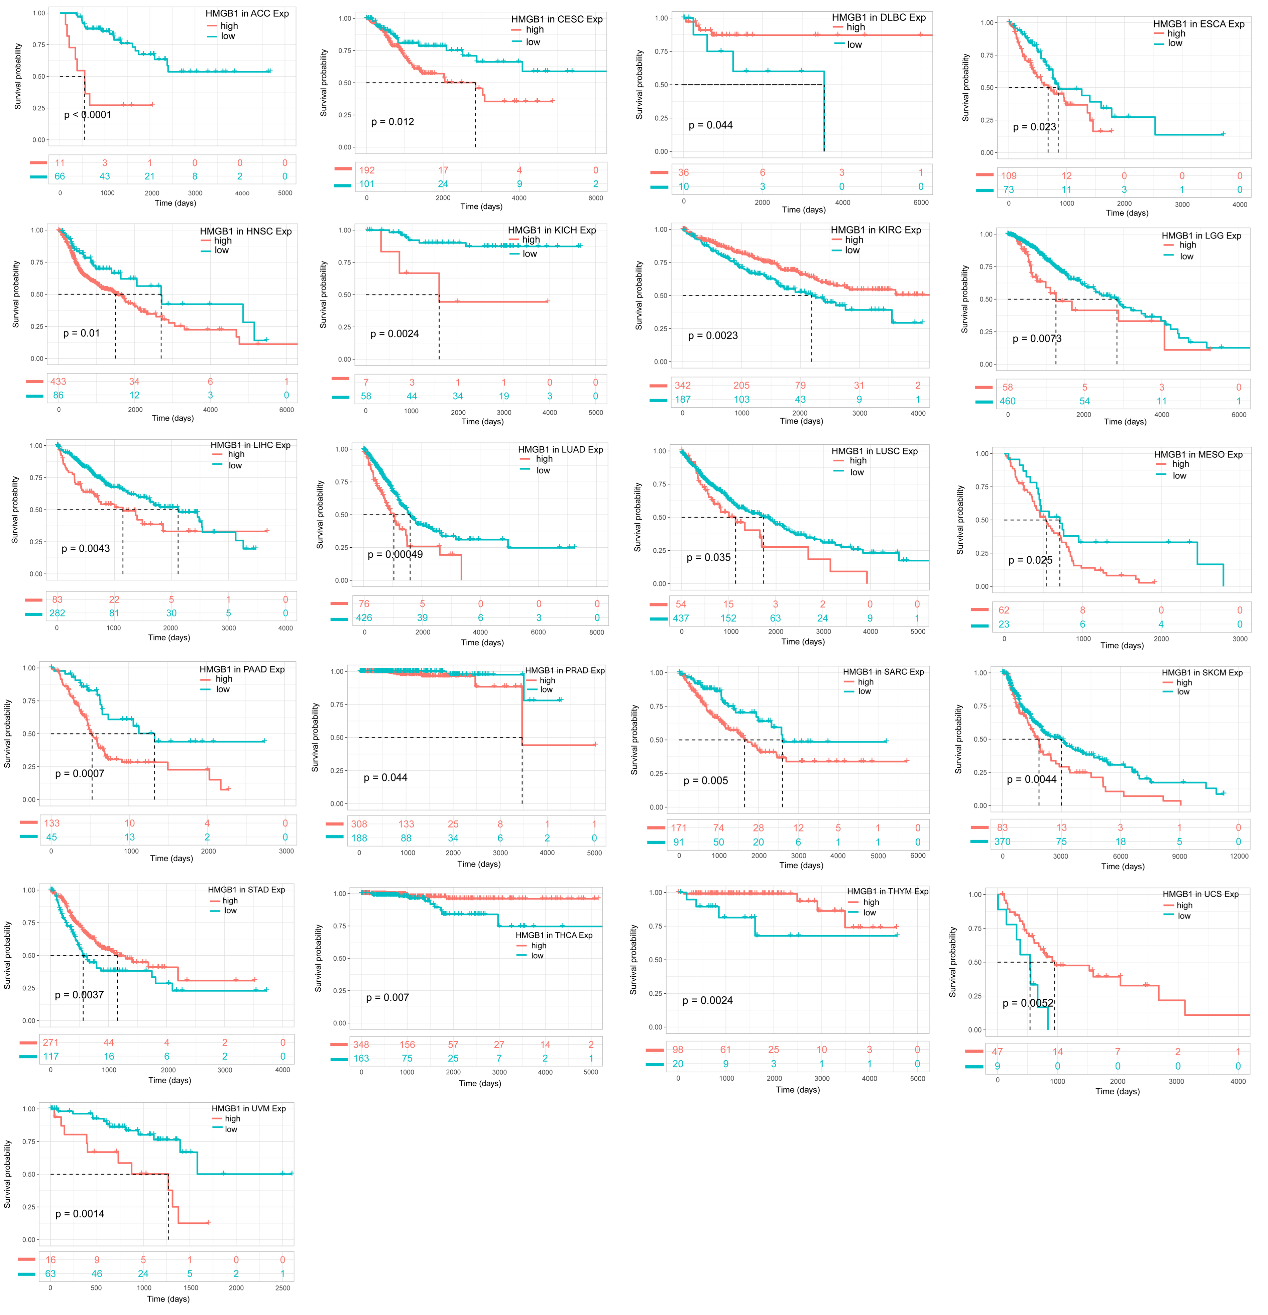


Figure S2: Overall survival curves of HMGB1 high and low expression subgroups in different tumors.


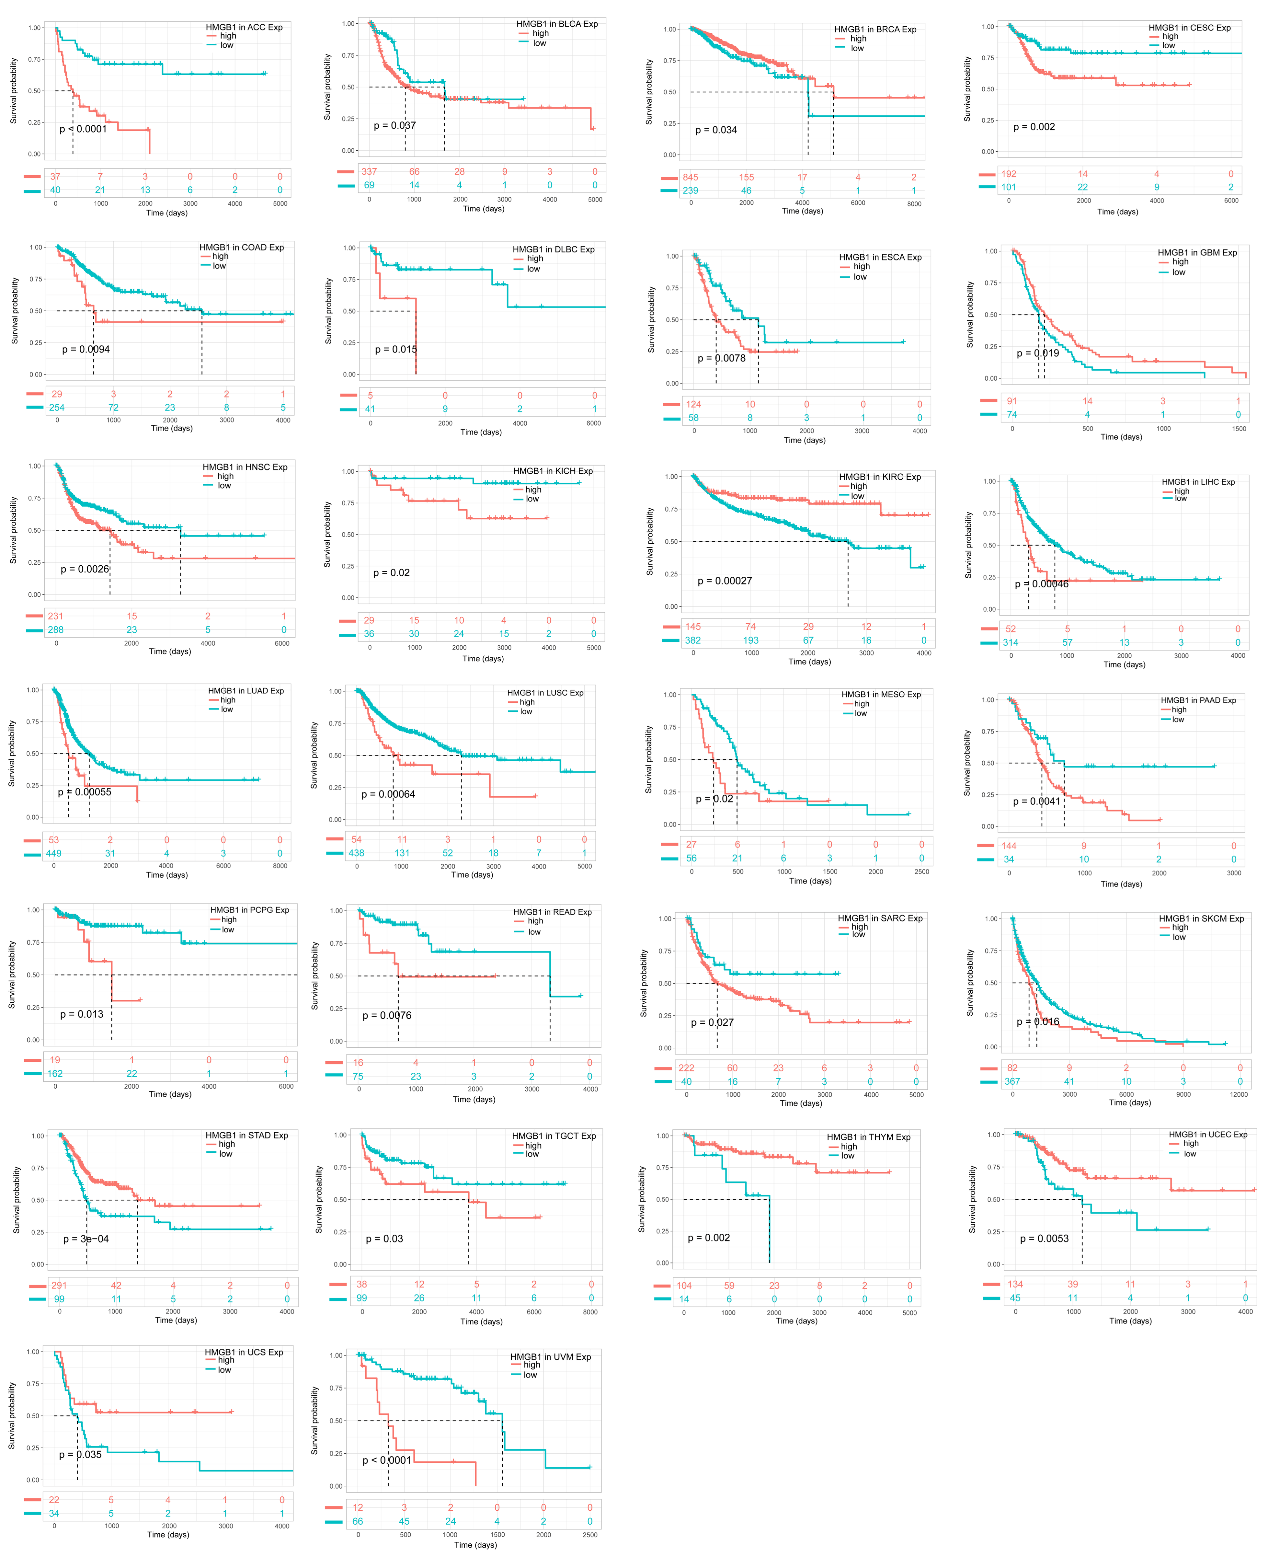


Figure S3: Progression-free interval survival curves of HMGB1 high and low expression subgroups in different tumors.


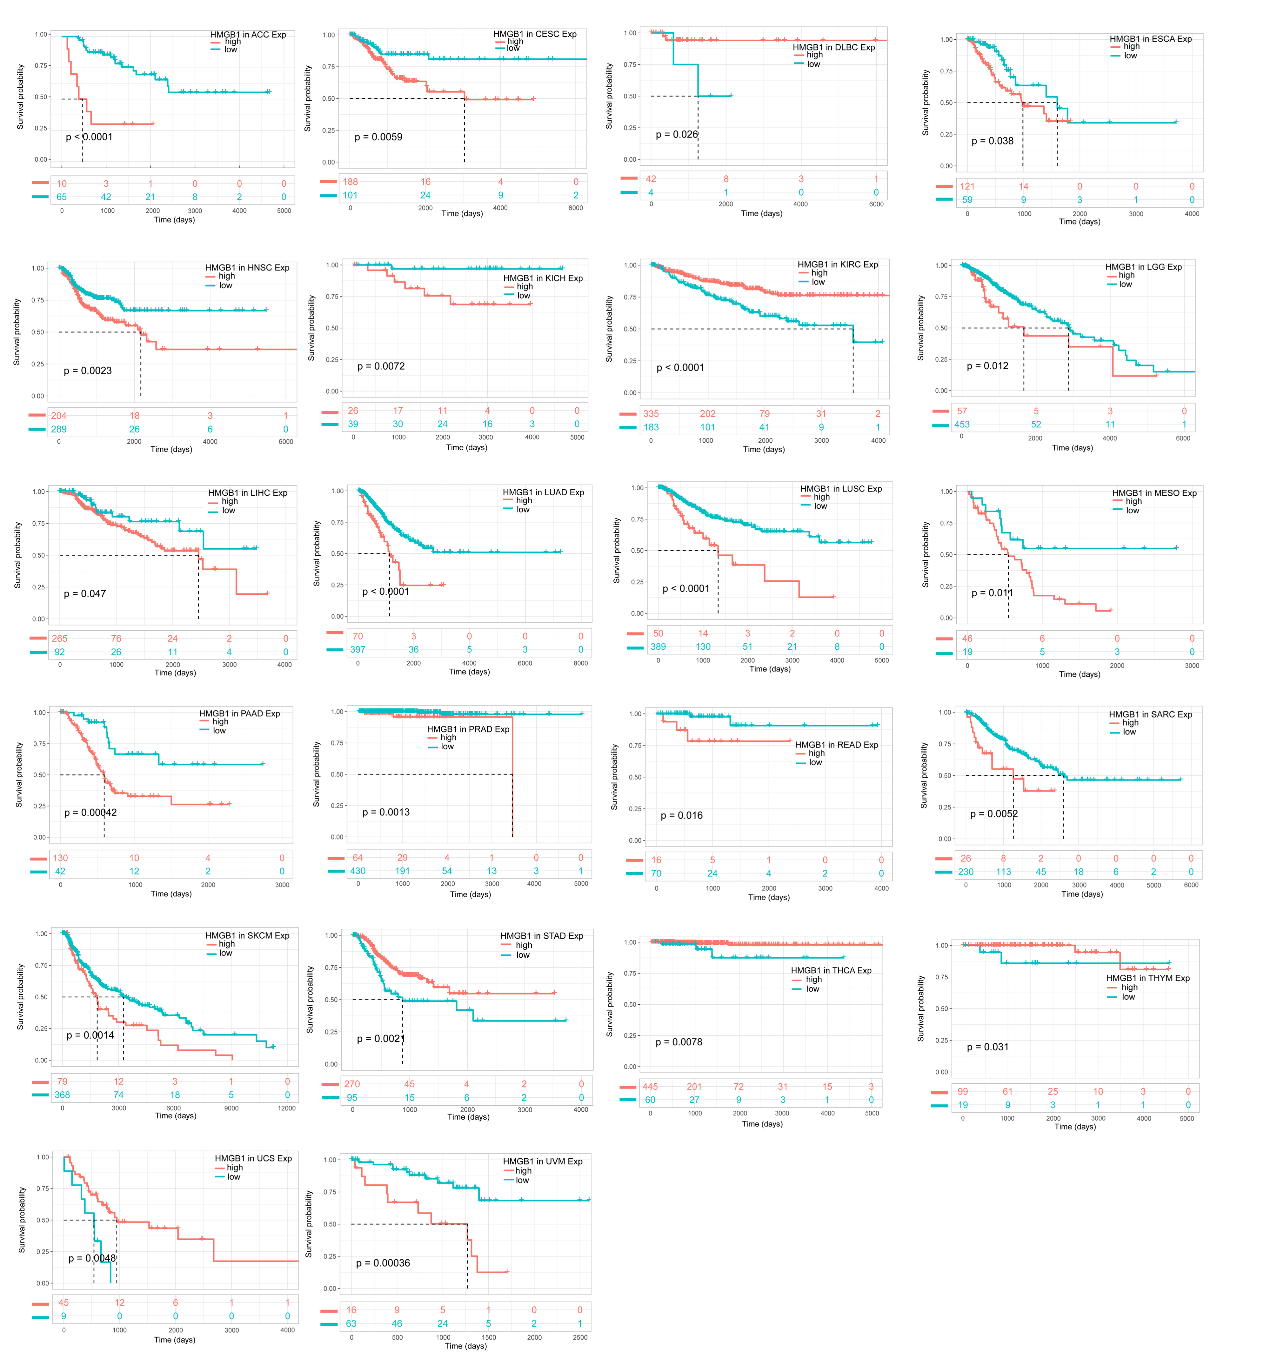


Figure S4: Disease-specific survival curves of HMGB1 high and low expression subgroups in different tumors.


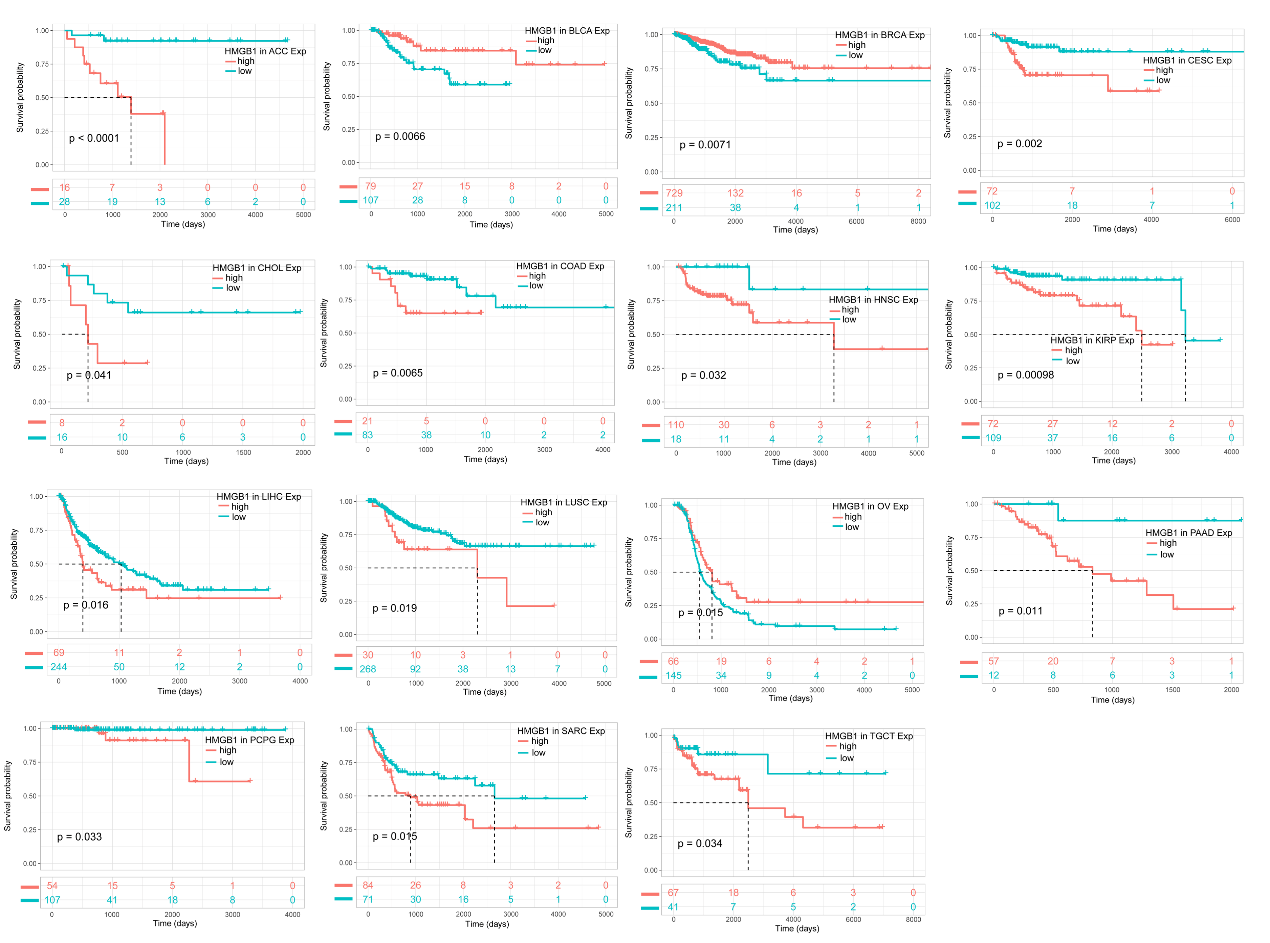


Figure S5: Disease-free interval survival curves of HMGB1 high and low expression subgroups in different tumors.

**Table S1: Abbreviations**

| **Abbreviations** | **Full names** |
| --- | --- |
| HMG  HMGB1  ICI | High mobility group  High mobility group box 1  Immune checkpoint inhibitor |
| DNA | deoxyribonucleic acid |
| RAGE | Receptor for advanced glycation end products |
| TLR  NF  TPM | Toll-like receptor  Nuclear factor  Transcripts per million mapped reads |
| OS | Overall survival |
| PFI  DSS  DFI | Progression-free interval  Disease-specific survival  Disease-free interval |
| HCC | Hepatocellular carcinoma |
| TMB | Tumor mutation burden |
| MSI  MMR | Microsatellite instability  Mismatch repair |
| TCGA | The Cancer Genome Atlas |
| GTEx | Genotype-Tissue Expression |
| CCLE | Cancer cell line encyclopedia |
| GDSC | Genomics of Drug Sensitivity in Cancer |
| HPA | Human Protein Atlas |
| ComPPI  TIMER  GDSC  GEO | Compartmentalized Protein-Protein Interaction Database  Tumor Immune Estimation Resource  Genomics of Drug Sensitivity in Cancer  Gene expression omnibus |
| TME | Tumor microenvironment |
| ESTIMATE | Estimation of stromal and immune cells in malignant tumor tissues using expression data |
| ACC | Adrenocortical carcinoma |
| BLCA | Bladder urothelial carcinoma |
| BRCA | Breast invasive carcinoma |
| CESC | Cervical squamous cell carcinoma and endocervical adenocarcinoma |
| CHOL | Cholangiocarcinoma |
| COAD | Colon adenocarcinoma |
| DLBC | Diffuse large B-cell lymphoma |
| ESCA | Esophageal carcinoma |
| GBM | Glioblastoma multiforme |
| HNSC | Head and neck squamous cell carcinoma |
| KICH | Kidney chromophobe |
| KIRC | Kidney renal clear cell carcinoma |
| KIRP | Kidney renal papillary cell carcinoma |
| LAML | Acute myeloid leukemia |
| IRS | Immunoreactivity scoring system |
| SOD1 | Superoxide dismutase 1 |
| HSPA8 | Heat shock protein member 8 |
| TP53 | Tumor protein P53 |
| KDR | Kinase insert domain receptor |
| IL10RB | Interleukin-10 receptor subunit β |
| TGFBR1 | Transforming growth factor β receptor 1 |
| ROC | Receiver operating characteristic |
| AUC | Area under curve |

**Table S2: Correlation between HMGB1 and IC50 of different drugs.**

| Correlation | P value | Drugs |
| --- | --- | --- |
| -0.27667 | 1.36E-15 | Camptothecin |
| -0.29802 | 8.70E-17 | Vinblastine |
| -0.33556 | 1.37E-21 | Cisplatin |
| -0.34734 | 1.16E-22 | Cytarabine |
| -0.20819 | 1.82E-15 | Docetaxel |
| -0.17155 | 2.33E-06 | Gefitinib |
| -0.34735 | 1.32E-22 | Navitoclax |
| -0.42061 | 1.01E-33 | Vorinostat |
| -0.32744 | 2.66E-20 | Nilotinib |
| -0.29391 | 1.44E-16 | Olaparib |
| -0.06337 | 0.665338 | Axitinib |
| -0.32701 | 2.12E-20 | AZD7762 |
| 0.067739 | 0.518825 | SB216763 |
| 0.082067 | 0.579219 | KU-55933 |
| -0.21984 | 3.19E-10 | Afatinib |
| -0.07737 | 0.03194 | Staurosporine |
| -0.08655 | 0.014711 | PLX-4720 |
| -0.16778 | 0.25961 | NU7441 |
| -0.31779 | 0.031382 | Doramapimod |
| -0.37241 | 3.76E-26 | Wee1 Inhibitor |
| -0.27667 | 5.60E-15 | Nutlin-3a (-) |
| -0.31513 | 3.35E-18 | Mirin |
| -0.30599 | 7.90E-18 | PD173074 |
| 0.034806 | 0.816335 | ZM447439 |
| -0.29967 | 1.50E-16 | Alisertib |
| 0.086843 | 0.557258 | RO-3306 |
| -0.29684 | 4.56E-17 | MK-2206 |
| -0.3149 | 4.29E-19 | Palbociclib |
| -0.10535 | 0.003898 | Dactolisib |
| -0.11383 | 0.001637 | Pictilisib |
| 0.054818 | 0.601749 | AZD8055 |
| -0.07177 | 0.042286 | PD0325901 |
| -0.18798 | 3.37E-07 | Obatoclax Mesylate |
| -0.25525 | 2.15E-13 | 5-Fluorouracil |
| 0.129624 | 0.000349 | Dasatinib |
| -0.26367 | 1.86E-13 | Paclitaxel |
| -0.2977 | 1.82E-16 | Crizotinib |
| -0.1687 | 3.82E-06 | Rapamycin |
| -0.35777 | 3.47E-24 | Sorafenib |
| 0.002416 | 0.987731 | BI-2536 |
| -0.31159 | 2.00E-19 | Irinotecan |
| -0.35881 | 1.60E-47 | Oxaliplatin |
| -0.12576 | 0.000561 | BMS-536924 |
| -0.28999 | 6.30E-17 | GSK1904529A |
| -0.04158 | 0.779035 | Tozasertib |
| 0.174446 | 0.235677 | PF-4708671 |
| -0.29532 | 4.45E-16 | PRIMA-1MET |
| -0.19449 | 8.09E-08 | Erlotinib |
| -0.37995 | 2.39E-26 | Niraparib |
| -0.37366 | 8.62E-27 | MK-1775 |
| -0.28744 | 2.94E-15 | Dinaciclib |
| -0.27056 | 4.24E-14 | Gemcitabine |
| -0.14551 | 6.13E-05 | Bortezomib |
| 0.013569 | 0.927066 | GSK269962A |
| -0.0029 | 0.984923 | SB505124 |
| -0.27964 | 5.39E-15 | Tamoxifen |
| -0.25061 | 9.93E-23 | Fulvestrant |
| -0.34046 | 4.17E-23 | EPZ004777 |
| -0.32273 | 1.29E-19 | YK-4-279 |
| -0.37911 | 1.96E-14 | Daporinad |
| -0.36929 | 7.09E-25 | BMS-345541 |
| -0.21054 | 1.09E-08 | AZ960 |
| -0.31304 | 2.12E-18 | Talazoparib |
| -0.20437 | 2.76E-08 | XAV939 |
| 0.098473 | 0.006345 | Trametinib |
| -0.26364 | 1.94E-13 | Dabrafenib |
| -0.30108 | 4.06E-17 | Temozolomide |
| -0.33559 | 1.44E-20 | AZD5438 |
| -0.28892 | 2.28E-15 | IAP_5620 |
| -0.09313 | 0.012055 | AZD2014 |
| -0.38139 | 1.62E-26 | AZD1208 |
| -0.11424 | 0.00205 | AZD1332 |
| -0.29806 | 2.32E-16 | Ruxolitinib |
| -0.31559 | 5.85E-20 | Linsitinib |
| -0.25091 | 3.23E-12 | Epirubicin |
| -0.30936 | 4.72E-18 | Cyclophosphamide |
| -0.28199 | 4.03E-15 | Pevonedistat |
| -0.07427 | 0.035715 | Sapitinib |
| -0.26315 | 9.03E-25 | Uprosertib |
| -0.24401 | 2.74E-11 | LCL161 |
| -0.15244 | 2.63E-05 | Lapatinib |
| -0.13958 | 7.38E-05 | Luminespib |
| -0.24629 | 1.56E-12 | Alpelisib |
| -0.16794 | 1.76E-06 | Taselisib |
| -0.34434 | 1.25E-23 | EPZ5676 |
| 0.019475 | 0.582306 | SCH772984 |
| -0.33282 | 3.27E-20 | IWP-2 |
| -0.36989 | 5.88E-25 | Leflunomide |
| -0.35468 | 4.02E-23 | Entinostat |
| -0.13211 | 0.032548 | OSI-027 |
| -0.32076 | 1.34E-20 | LGK974 |
| -0.39477 | 1.73E-28 | VE-822 |
| -0.16447 | 8.42E-06 | WZ4003 |
| -0.2699 | 1.39E-13 | CZC24832 |
| -0.2124 | 9.98E-09 | AZD5582 |
| -0.23225 | 2.92E-10 | GSK2606414 |
| -0.31736 | 1.88E-18 | PFI3 |
| -0.32294 | 4.39E-19 | PCI-34051 |
| -0.25786 | 1.72E-12 | Wnt-C59 |
| -0.24031 | 5.54E-11 | I-BET-762 |
| -0.27422 | 5.67E-14 | RVX-208 |
| -0.19993 | 5.56E-08 | OTX015 |
| -0.2906 | 1.42E-15 | GSK343 |
| -0.31284 | 6.00E-18 | ML323 |
| -0.1147 | 0.001964 | Entospletinib |
| -0.24803 | 1.22E-11 | PRT062607 |
| -0.24502 | 0.100756 | Ribociclib |
| -0.33992 | 4.29E-21 | AGI-6780 |
| -0.31591 | 2.74E-18 | Picolinici-acid |
| -0.23121 | 2.97E-10 | AZD5153 |
| -0.32216 | 5.70E-19 | CDK9_5576 |
| -0.30764 | 2.34E-17 | CDK9_5038 |
| -0.31947 | 1.36E-18 | Eg5_9814 |
| 0.009515 | 0.79799 | ERK_2440 |
| 0.005219 | 0.888355 | ERK_6604 |
| -0.25907 | 1.34E-12 | IRAK4_4710 |
| -0.30118 | 1.09E-16 | JAK1_8709 |
| -0.39557 | 1.85E-28 | AZD5991 |
| -0.28907 | 2.02E-15 | PAK_5339 |
| -0.27286 | 7.63E-14 | TAF1_5496 |
| -0.24561 | 2.08E-11 | ULK1_4989 |
| -0.23608 | 1.18E-10 | VSP34_8731 |
| 0.026304 | 0.479171 | Selumetinib |
| -0.20512 | 2.51E-08 | IGF1R_3801 |
| -0.22381 | 1.08E-09 | JAK_8517 |
| -0.24954 | 3.75E-12 | AZD4547 |
| -0.20146 | 4.76E-08 | Ibrutinib |
| -0.37293 | 2.26E-25 | Zoledronate |
| -0.14171 | 0.000128 | Acetalax |
| -0.35046 | 2.09E-22 | Carmustine |
| -0.27479 | 4.81E-14 | Topotecan |
| -0.29954 | 1.62E-16 | Teniposide |
| -0.3085 | 1.80E-17 | Mitoxantrone |
| -0.17141 | 4.12E-11 | Dactinomycin |
| -0.32046 | 8.42E-19 | Fludarabine |
| -0.3628 | 5.65E-24 | Nelarabine |
| -0.32614 | 2.64E-19 | Vincristine |
| -0.29393 | 6.19E-16 | Podophyllotoxin bromide |
| -0.1764 | 1.79E-06 | Dihydrorotenone |
| -0.3222 | 5.34E-19 | Gallibiscoquinazole |
| -0.33003 | 6.59E-20 | Elephantin |
| -0.28563 | 4.27E-15 | Sinularin |
| -0.3427 | 2.22E-21 | Sabutoclax |
| -0.30833 | 1.87E-17 | LY2109761 |
| -0.23579 | 1.25E-10 | OF-1 |
| -0.23719 | 9.64E-11 | MN-64 |
| -0.35459 | 6.20E-23 | KRAS (G12C) Inhibitor-12 |
| -0.09188 | 0.010798 | MG-132 |
| -0.2236 | 6.10E-10 | BDP-00009066 |
| -0.22622 | 3.79E-10 | Buparlisib |
| -0.14699 | 1.13E-08 | Ulixertinib |
| -0.39992 | 2.74E-30 | Venetoclax |
| -0.36724 | 2.69E-25 | ABT737 |
| -0.2355 | 6.94E-11 | Afuresertib |
| -0.31704 | 5.97E-19 | AGI-5198 |
| -0.2114 | 4.27E-09 | AZD3759 |
| -0.2156 | 2.51E-09 | AZD5363 |
| -0.35011 | 5.08E-23 | AZD6738 |
| -0.06747 | 0.064958 | AZD8186 |
| -0.20083 | 2.96E-08 | Osimertinib |
| -0.15175 | 3.04E-05 | Cediranib |
| -0.22306 | 6.72E-10 | Ipatasertib |
| -0.26771 | 9.28E-14 | GDC0810 |
| -0.06704 | 0.069308 | GNE-317 |
| -0.26514 | 1.63E-13 | GSK2578215A |
| -0.32099 | 2.06E-19 | I-BRD9 |
| -0.22047 | 1.07E-09 | Telomerase Inhibitor IX |
| -0.38002 | 4.14E-27 | MIRA-1 |
| -0.30015 | 4.65E-17 | NVP-ADW742 |
| -0.33035 | 1.57E-20 | P22077 |
| -0.28719 | 1.14E-15 | Savolitinib |
| -0.19132 | 1.32E-07 | UMI-77 |
| -0.14965 | 3.97E-05 | WIKI4 |
| -0.05578 | 0.127216 | Sepantronium bromide |
| -0.24914 | 4.63E-12 | MIM1 |
| -0.26915 | 6.75E-14 | WEHI-539 |
| -0.18978 | 1.67E-07 | BPD-00008900 |
| -0.2297 | 2.11E-10 | Foretinib |
| -0.30605 | 1.22E-17 | BIBR-1532 |
| -0.27442 | 2.26E-14 | Pyridostatin |
| -0.29466 | 2.27E-16 | AMG-319 |
| -0.376 | 1.83E-26 | MK-8776 |
| -0.30012 | 5.42E-17 | Vinorelbine |
| -0.13593 | 0.000202 | VX-11e |
| -0.30353 | 2.67E-17 | LJI308 |
| -0.26385 | 2.67E-13 | AZ6102 |
| -0.25531 | 1.66E-12 | GSK591 |
| -0.37102 | 1.35E-25 | VE821 |
| -0.04648 | 0.756356 | AZD6482 |
| -0.1976 | 5.73E-08 | AT13148 |
| 0.112615 | 0.466727 | BMS-754807 |
| -0.28249 | 0.054365 | JQ1 |
